# Supplementary material for: Dimeric versus polymeric coordination in copper(ii) cationic complexes with bis(chelating) oxime and amide ligands
Source: Royal Society of Chemistry journal article supplement (doi:10.1039/c0dt00008f), 2010-01-01

## Dimeric *versus* polymeric coordination in copper(II) cationic complexes with bis(chelating) oxime-and-amide ligands

Andrii I. Buvailo, Elzbieta Gumienna-Kontecka, Svetlana V. Pavlova, Igor O. Fritsky and Matti Haukka

### Supporting Information

**Fig. S1.** UV-VIS spectra of the Cu(II)- **H<sub>2</sub>papt** system.

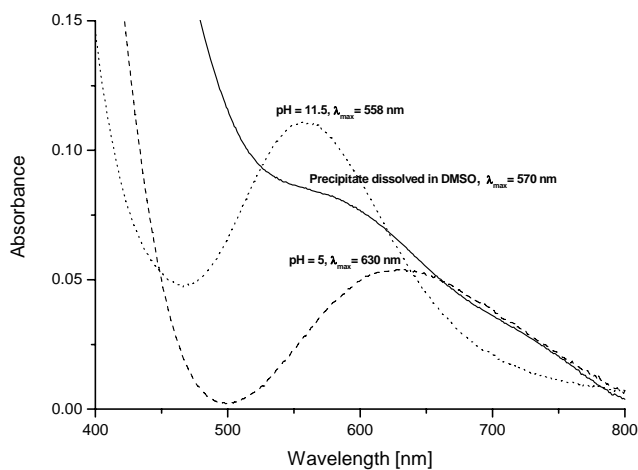

**Fig. S2.** EPR spectra of the Cu(II)- **H<sub>2</sub>papt** system.

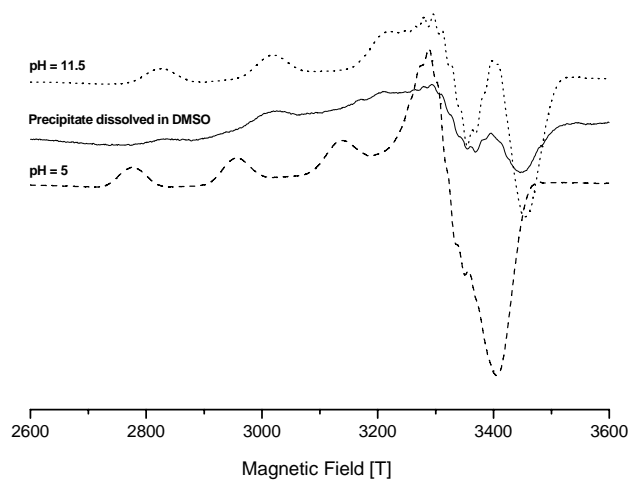

**Fig. S3.** FTIR spectra of the free ligand H<sub>2</sub>pah (a) and its Cu<sup>2+</sup> coordination compound [ $\{\text{Cu}(\text{Hpah})(\text{NO}_3)(\text{CH}_3\text{OH})\}_2$ ] (b).

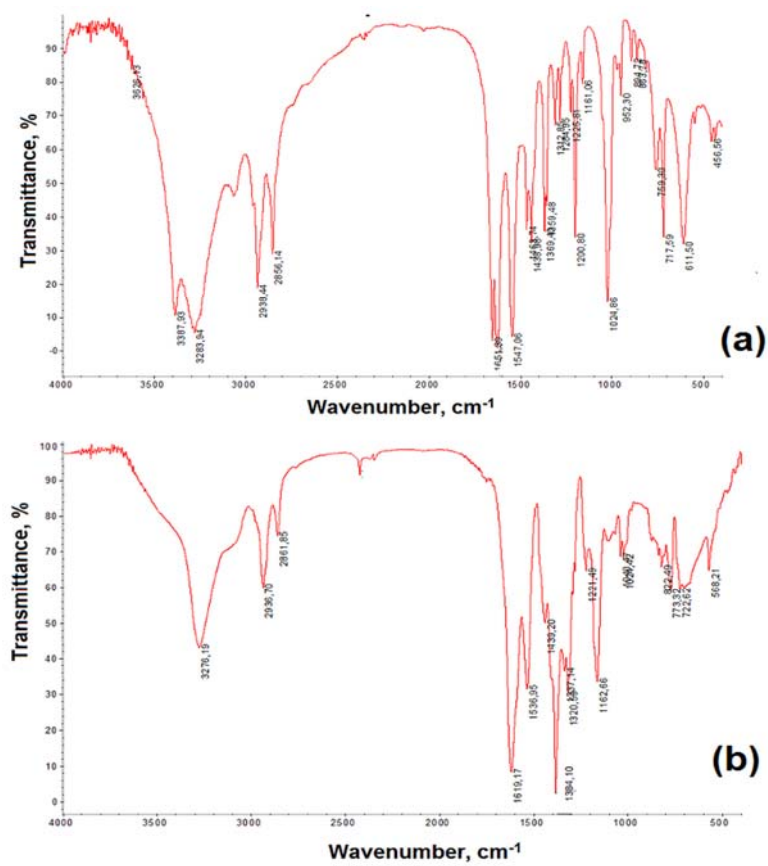

**Fig. S4.** Typical ESI patterns observed for the studied complexes (on the example of **H<sub>2</sub>papt** – Cu(NO<sub>3</sub>)<sub>2</sub> system).

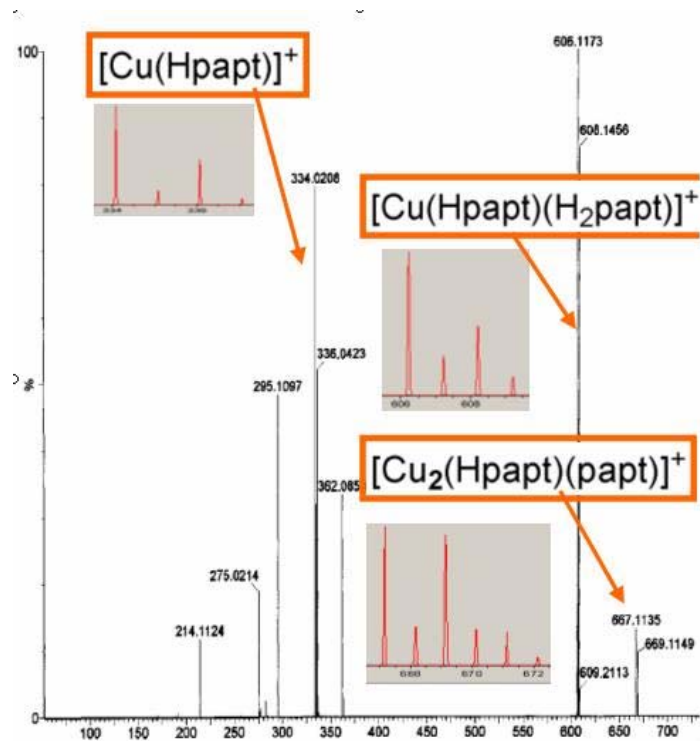

Supplement: c0dt00008f.pdf [file c0dt00008f.pdf]
